# Supplementary material for: African Americans and European Americans exhibit distinct gene expression patterns across tissues and tumors that are associated with immunologic and infectious functions and environmental exposures
Source: Research Square preprint supplement (doi:10.21203/rs.3.rs-88890/v1), 2020-10-08
Supplement: Supplementary file 1 [file 27456f6908f863f1fea0f995.pdf]

# Differential expression of COVID-19-related genes in European Americans and African Americans

Urminder Singh<sup>1,2,3</sup>, Kyle M. Hernandez<sup>4,5</sup>, Bruce J. Aronow<sup>6</sup>, and Eve Syrkin Wurtele<sup>1,2,3\*</sup>

<sup>1</sup>Bioinformatics and Computational Biology Program, Iowa State University, Ames, IA, 50011, USA

<sup>2</sup>Center for Metabolic Biology, Iowa State University, Ames, IA, 50011, USA

<sup>3</sup>Genetics Development and Cell Biology, Iowa State University, Ames, IA, 50011, USA

<sup>4</sup>Department of Medicine, University of Chicago, Chicago, IL, 60637

<sup>5</sup>Center for Translational Data Science, University of Chicago, Chicago, IL, 60637

<sup>6</sup>Biomedical Informatics, Cincinnati Children's Hospital Medical Center, Cincinnati, OH 45229

\*mash@iastate.edu

## ABSTRACT

## Contents

|          |                              |          |
|----------|------------------------------|----------|
| <b>1</b> | <b>Supplementary Figures</b> | <b>1</b> |
|          | <b>References</b>            | <b>2</b> |

# 1 Supplementary Figures

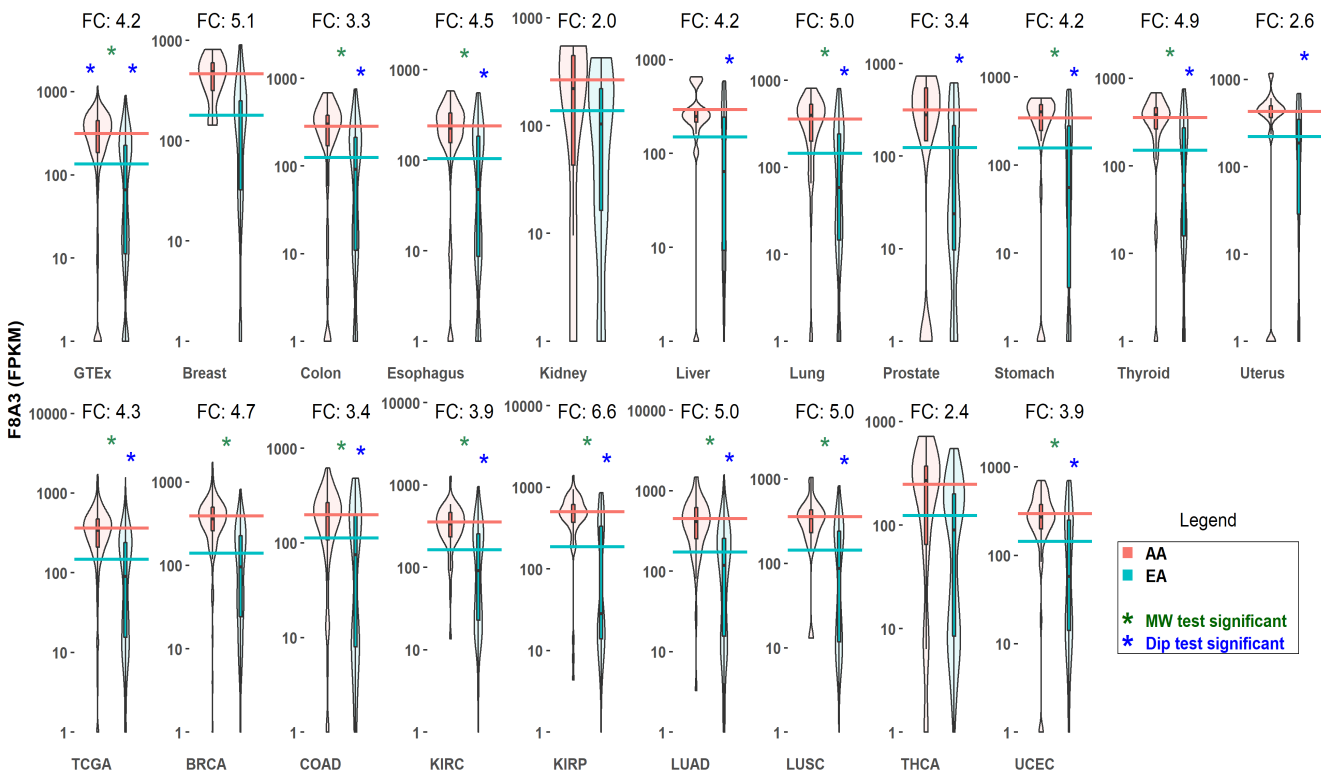

**Supplementary Figure 1.** Expression of the HAP40-encoding putative early endosome trafficking gene F8A3 in African Americans and European Americans across multiple conditions. HAP40 protein is a key component of Huntington's Disease and shifts endosomal trafficking from the microtubules to actin<sup>1</sup>. Violin plots summarize the expression over each sample in the two populations. AA, African American; EA, European American. Horizontal lines represent mean log expression. \*, Hartigan's dip test significant (p-value < 0.05); \*, MW test significant (BH corrected p-value < 0.05). FC, fold change AA/EA. GTEx and TCGA represent the pooled samples from each project.

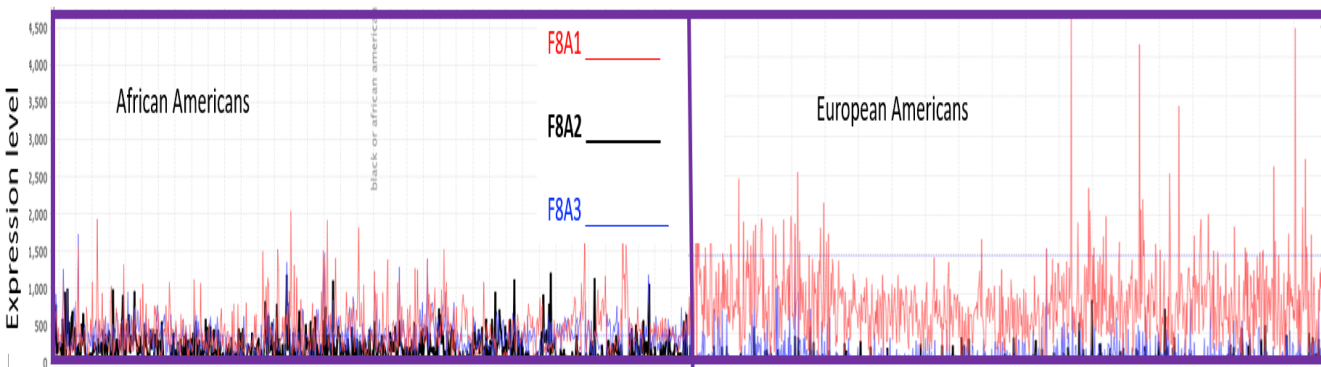

**Supplementary Figure 2.** Line plot comparing expression levels of the F8A genes in African Americans and European Americans. X axis, samples of breast, thyroid and lung tissues from GTEx; 300 samples are shown for each population. Y axis, Expression values. Each line represents a gene.

## References

1. Pal, A., Severin, F., Lommer, B., Shevchenko, A. & Zerial, M. Huntingtin–hap40 complex is a novel rab5 effector that regulates early endosome motility and is up-regulated in huntington’s disease. *The J. cell biology* **172**, 605–618 (2006).
